# Supplementary material for: High Molecular Weight Hyaluronic Acid Reduces the Expression of Virulence Genes fimA, mfa1, hagA, rgpA, and kgp in the Oral Pathogen Porphyromonas gingivalis
Source: MDPI journal article supplement (doi:10.3390/pharmaceutics14081628), 2022-08-04
Supplement: s1 [file s1]

**Table S1.** Overall fold-change values for independent genes.

|      | Mean Std. Deviation |      |      | ANOVA (P-value) | 95% Confidence Interval for Mean |             | Games-Howell post-hoc test (P-value) |       |       |         |
|------|---------------------|------|------|-----------------|----------------------------------|-------------|--------------------------------------|-------|-------|---------|
|      |                     |      |      |                 | Lower Bound                      | Upper Bound | AZM                                  | CHX   | HA    | Control |
| FimA | Azm                 | 0.20 | 0.15 | 0.000           | 0.1428                           | 0.2656      |                                      | 0.000 | 0.026 | 0.000   |
|      | CHX                 | 0.49 | 0.23 |                 | 0.3959                           | 0.591       | 0.000                                |       | 0.131 | 0.000   |
|      | HA                  | 0.35 | 0.20 |                 | 0.2687                           | 0.4389      | 0.026                                | 0.131 |       | 0.000   |
|      | Control             | 1.00 | 0.05 |                 | 0.9459                           | 1.0564      | 0.000                                | 0.000 | 0.000 |         |
| Mfa1 | Azm                 | 0.28 | 0.13 | 0.000           | 0.2307                           | 0.3388      |                                      | 0.007 | 0.092 | 0.002   |
|      | CHX                 | 0.87 | 0.78 |                 | 0.5387                           | 1.1937      | 0.007                                |       | 0.125 | 0.825   |
|      | HA                  | 0.47 | 0.35 |                 | 0.3224                           | 0.6192      | 0.092                                | 0.125 |       | 0.003   |
|      | Control             | 1.03 | 0.24 |                 | 0.7763                           | 1.276       | 0.002                                | 0.825 | 0.003 |         |
| HagA | Azm                 | 0.30 | 0.18 | 0.000           | 0.2238                           | 0.38        |                                      | 0.014 | 0.163 | 0.000   |
|      | CHX                 | 0.66 | 0.50 |                 | 0.4476                           | 0.874       | 0.014                                |       | 0.228 | 0.023   |
|      | HA                  | 0.44 | 0.25 |                 | 0.3309                           | 0.5426      | 0.163                                | 0.228 |       | 0.000   |
|      | Control             | 1.01 | 0.11 |                 | 0.891                            | 1.1191      | 0.000                                | 0.023 | 0.000 |         |
| RgpA | Azm                 | 0.47 | 0.38 | 0.004           | 0.3162                           | 0.6335      |                                      | 0.022 | 0.380 | 0.000   |
|      | CHX                 | 1.20 | 1.09 |                 | 0.7426                           | 1.6661      | 0.022                                |       | 0.147 | 0.838   |
|      | HA                  | 0.67 | 0.46 |                 | 0.476                            | 0.8681      | 0.380                                | 0.147 |       | 0.035   |
|      | Control             | 1.01 | 0.16 |                 | 0.8387                           | 1.1815      | 0.000                                | 0.838 | 0.035 |         |
| RgpB | Azm                 | 0.37 | 0.25 | 0.001           | 0.264                            | 0.4737      |                                      | 0.018 | 0.527 | 0.033   |
|      | CHX                 | 1.05 | 1.02 |                 | 0.625                            | 1.4849      | 0.018                                |       | 0.065 | 1.000   |
|      | HA                  | 0.48 | 0.33 |                 | 0.3441                           | 0.6253      | 0.527                                | 0.065 |       | 0.068   |
|      | Control             | 1.06 | 0.42 |                 | 0.6171                           | 1.4939      | 0.033                                | 1.000 | 0.068 |         |
| Kgp  | Azm                 | 0.21 | 0.13 | 0.000           | 0.1561                           | 0.2635      |                                      | 0.000 | 0.055 | 0.007   |
|      | CHX                 | 0.76 | 0.47 |                 | 0.5676                           | 0.9607      | 0.000                                |       | 0.002 | 0.379   |
|      | HA                  | 0.35 | 0.22 |                 | 0.2544                           | 0.4394      | 0.055                                | 0.002 |       | 0.013   |
|      | Control             | 1.05 | 0.35 |                 | 0.6864                           | 1.4209      | 0.007                                | 0.379 | 0.013 |         |

**Table S2.** Concentration fold-change values for independent genes.

|      |       | Mean | Std. Deviation | ANOVA<br>(P-value) | 95% Confidence Interval for Mean |             | Games-Howell post-hoc test (P-value) |       |       |       |         |
|------|-------|------|----------------|--------------------|----------------------------------|-------------|--------------------------------------|-------|-------|-------|---------|
|      |       |      |                |                    | Lower Bound                      | Upper Bound | 100%                                 | 50%   | 25%   | 12.5% | Control |
| FimA |       |      |                |                    |                                  |             |                                      |       |       |       |         |
| AZM  | 100%  | 0.07 | 0.01           | 0.000              | 0.0668                           | 0.0784      |                                      | 0.000 | 0.001 | 0.812 | 0.000   |
|      | 50%   | 0.16 | 0.02           |                    | 0.1465                           | 0.1815      | 0.000                                |       | 0.002 | 1.000 | 0.000   |
|      | 25%   | 0.36 | 0.05           |                    | 0.3052                           | 0.4096      | 0.001                                | 0.002 |       | 0.897 | 0.000   |
|      | 12.5% | 0.22 | 0.21           |                    | 0.0044                           | 0.4411      | 0.812                                | 1.000 | 0.897 |       | 0.003   |
| CHX  | 100%  | 0.62 | 0.29           | 0.000              | 0.3168                           | 0.9276      |                                      | 1.000 | 0.377 | 0.754 | 0.285   |
|      | 50%   | 0.69 | 0.07           |                    | 0.6149                           | 0.7712      | 1.000                                |       | 0.000 | 0.007 | 0.001   |
|      | 25%   | 0.28 | 0.08           |                    | 0.1993                           | 0.3568      | 0.377                                | 0.000 |       | 0.746 | 0.000   |
|      | 12.5% | 0.38 | 0.11           |                    | 0.2699                           | 0.4911      | 0.754                                | 0.007 | 0.746 |       | 0.000   |
| HA   | 100%  | 0.37 | 0.05           | 0.000              | 0.3157                           | 0.4214      |                                      | 0.191 | 0.830 | 1.000 | 0.000   |
|      | 50%   | 0.49 | 0.07           |                    | 0.4106                           | 0.5666      | 0.191                                |       | 0.299 | 0.979 | 0.000   |
|      | 25%   | 0.22 | 0.21           |                    | 0.0022                           | 0.4351      | 0.830                                | 0.299 |       | 0.999 | 0.003   |
|      | 12.5% | 0.34 | 0.30           |                    | 0.0213                           | 0.6579      | 1.000                                | 0.979 | 0.999 |       | 0.045   |
| Mfa1 |       |      |                |                    |                                  |             |                                      |       |       |       |         |
| AZM  | 100%  | 0.25 | 0.12           | 0.000              | 0.1256                           | 0.3735      |                                      | 1.000 | 0.745 | 1.000 | 0.004   |
|      | 50%   | 0.21 | 0.07           |                    | 0.1374                           | 0.2814      | 1.000                                |       | 0.374 | 0.848 | 0.010   |
|      | 25%   | 0.41 | 0.16           |                    | 0.238                            | 0.5808      | 0.745                                | 0.374 |       | 0.725 | 0.016   |
|      | 12.5% | 0.27 | 0.05           |                    | 0.2141                           | 0.3273      | 1.000                                | 0.848 | 0.725 |       | 0.008   |
| CHX  | 100%  | 1.15 | 0.31           | 0.000              | 0.8286                           | 1.4808      |                                      | 0.990 | 0.022 | 0.011 | 0.999   |
|      | 50%   | 1.63 | 1.07           |                    | 0.5133                           | 2.7504      | 0.990                                |       | 0.386 | 0.307 | 0.946   |
|      | 25%   | 0.39 | 0.21           |                    | 0.1728                           | 0.6134      | 0.022                                | 0.386 |       | 0.989 | 0.020   |
|      | 12.5% | 0.29 | 0.12           |                    | 0.163                            | 0.4075      | 0.011                                | 0.307 | 0.989 |       | 0.005   |
| HA   | 100%  | 0.83 | 0.39           | 0.000              | 0.4244                           | 1.2336      |                                      | 0.971 | 0.123 | 0.272 | 0.992   |
|      | 50%   | 0.56 | 0.34           |                    | 0.1956                           | 0.9181      | 0.971                                |       | 0.440 | 0.849 | 0.355   |
|      | 25%   | 0.18 | 0.08           |                    | 0.0967                           | 0.2577      | 0.123                                | 0.440 |       | 0.087 | 0.003   |
|      | 12.5% | 0.32 | 0.04           |                    | 0.2765                           | 0.3637      | 0.272                                | 0.849 | 0.087 |       | 0.012   |
| HagA |       |      |                |                    |                                  |             |                                      |       |       |       |         |
| AZM  | 100%  | 0.20 | 0.02           | 0.000              | 0.18                             | 0.224       |                                      | 0.859 | 0.025 | 0.981 | 0.000   |
|      | 50%   | 0.23 | 0.04           |                    | 0.1913                           | 0.2738      | 0.859                                |       | 0.045 | 0.996 | 0.000   |

|      |       |      |      |         |        |        |       |       |       |       |       |  |
|------|-------|------|------|---------|--------|--------|-------|-------|-------|-------|-------|--|
| CHX  | 25%   | 0.42 | 0.09 | 0.000   | 0.3261 | 0.5088 | 0.025 | 0.045 |       | 1.000 | 0.000 |  |
|      | 12.5% | 0.36 | 0.33 |         | 0.0067 | 0.7047 | 0.981 | 0.996 | 1.000 |       | 0.068 |  |
|      | 100%  | 1.01 | 0.46 |         | 0.5304 | 1.4865 |       | 0.995 | 0.094 | 0.143 | 1.000 |  |
|      | 50%   | 1.19 | 0.11 |         | 1.0746 | 1.3019 | 0.995 |       | 0.000 | 0.000 | 0.279 |  |
|      | 25%   | 0.18 | 0.04 |         | 0.1365 | 0.2155 | 0.094 | 0.000 |       | 0.537 | 0.000 |  |
|      | 12.5% | 0.27 | 0.09 |         | 0.176  | 0.3651 | 0.143 | 0.000 | 0.537 |       | 0.000 |  |
| HA   | 100%  | 0.58 | 0.15 |         | 0.4216 | 0.7467 |       | 1.000 | 0.195 | 0.963 | 0.012 |  |
|      | 50%   | 0.54 | 0.13 |         | 0.408  | 0.6719 | 1.000 |       | 0.270 | 0.991 | 0.002 |  |
|      | 25%   | 0.24 | 0.21 |         | 0.0154 | 0.4593 | 0.195 | 0.270 |       | 0.998 | 0.002 |  |
|      | 12.5% | 0.39 | 0.34 |         | 0.0299 | 0.7414 | 0.963 | 0.991 | 0.998 |       | 0.090 |  |
| RgpA |       |      |      |         |        |        |       |       |       |       |       |  |
| AZM  | 100%  | 0.24 | 0.07 |         | 0.1706 | 0.3176 |       | 0.996 | 0.003 | 0.927 | 0.000 |  |
|      | 50%   | 0.30 | 0.12 | 0.1752  | 0.4208 | 0.996  |       | 0.007 | 0.972 | 0.000 |       |  |
|      | 25%   | 0.74 | 0.15 | 0.5872  | 0.8984 | 0.003  | 0.007 |       | 1.000 | 0.265 |       |  |
|      | 12.5% | 0.61 | 0.63 | -0.0474 | 1.2765 | 0.927  | 0.972 | 1.000 |       | 0.914 |       |  |
| CHX  | 100%  | 1.90 | 0.34 | 1.5438  | 2.254  |        | 0.718 | 0.001 | 0.001 | 0.014 |       |  |
|      | 50%   | 2.50 | 0.65 | 1.8118  | 3.1833 | 0.718  |       | 0.006 | 0.006 | 0.036 |       |  |
|      | 25%   | 0.20 | 0.04 | 0.1645  | 0.2448 | 0.001  | 0.006 |       | 1.000 | 0.001 |       |  |
|      | 12.5% | 0.22 | 0.04 | 0.1706  | 0.2621 | 0.001  | 0.006 | 1.000 |       | 0.001 |       |  |
| HA   | 100%  | 1.10 | 0.27 | 0.8205  | 1.3779 |        | 0.117 | 0.020 | 0.900 | 1.000 |       |  |
|      | 50%   | 0.63 | 0.16 | 0.4552  | 0.7992 | 0.117  |       | 0.559 | 1.000 | 0.061 |       |  |
|      | 25%   | 0.31 | 0.29 | -0.0005 | 0.6181 | 0.020  | 0.559 |       | 0.981 | 0.025 |       |  |
|      | 12.5% | 0.65 | 0.65 | -0.0327 | 1.3388 | 0.900  | 1.000 | 0.981 |       | 0.959 |       |  |
| RgpB |       |      |      |         |        |        |       |       |       |       |       |  |
| AZM  | 100%  | 0.18 | 0.01 | 0.1642  | 0.1945 |        | 0.055 | 0.001 | 0.852 | 0.056 |       |  |
|      | 50%   | 0.29 | 0.05 | 0.2312  | 0.3391 | 0.055  |       | 0.002 | 0.990 | 0.090 |       |  |
|      | 25%   | 0.55 | 0.08 | 0.4682  | 0.6275 | 0.001  | 0.002 |       | 1.000 | 0.344 |       |  |
|      | 12.5% | 0.46 | 0.42 | 0.0249  | 0.9012 | 0.852  | 0.990 | 1.000 |       | 0.477 |       |  |
| CHX  | 100%  | 1.67 | 0.74 | 0.8891  | 2.443  |        | 0.886 | 0.061 | 0.065 | 0.827 |       |  |
|      | 50%   | 2.23 | 0.44 | 1.7711  | 2.6916 | 0.886  |       | 0.001 | 0.002 | 0.023 |       |  |
|      | 25%   | 0.15 | 0.03 | 0.1148  | 0.1804 | 0.061  | 0.001 |       | 0.932 | 0.048 |       |  |
|      | 12.5% | 0.17 | 0.03 | 0.1408  | 0.2086 | 0.065  | 0.002 | 0.932 |       | 0.054 |       |  |
| HA   | 100%  | 0.93 | 0.08 | 0.8519  | 1.0094 |        | 0.000 | 0.000 | 0.122 | 0.999 |       |  |

|     |       |      |      |       |        |        |       |       |       |       |       |
|-----|-------|------|------|-------|--------|--------|-------|-------|-------|-------|-------|
|     | 50%   | 0.46 | 0.06 |       | 0.3923 | 0.5258 | 0.000 |       | 0.088 | 1.000 | 0.216 |
|     | 25%   | 0.18 | 0.15 |       | 0.0198 | 0.3392 | 0.000 | 0.088 |       | 0.968 | 0.049 |
|     | 12.5% | 0.37 | 0.33 |       | 0.0212 | 0.7179 | 0.122 | 1.000 | 0.968 |       | 0.214 |
| Kgp |       |      |      |       |        |        |       |       |       |       |       |
| AZM | 100%  | 0.13 | 0.05 |       | 0.0758 | 0.1809 |       | 0.870 | 0.152 | 0.995 | 0.020 |
|     | 50%   | 0.18 | 0.06 |       | 0.1208 | 0.2381 | 0.870 |       | 0.367 | 1.000 | 0.026 |
|     | 25%   | 0.35 | 0.14 |       | 0.2041 | 0.4927 | 0.152 | 0.367 |       | 0.643 | 0.058 |
|     | 12.5% | 0.18 | 0.13 |       | 0.0464 | 0.3197 | 0.995 | 1.000 | 0.643 |       | 0.021 |
| CHX | 100%  | 0.95 | 0.55 | 0.000 | 0.3687 | 1.5232 |       | 0.992 | 0.656 | 0.602 | 1.000 |
|     | 50%   | 1.23 | 0.34 |       | 0.8693 | 1.5841 | 0.992 |       | 0.031 | 0.035 | 0.999 |
|     | 25%   | 0.45 | 0.17 |       | 0.2706 | 0.6236 | 0.656 | 0.031 |       | 1.000 | 0.116 |
|     | 12.5% | 0.44 | 0.07 |       | 0.3679 | 0.5056 | 0.602 | 0.035 | 1.000 |       | 0.105 |
| HA  | 100%  | 0.46 | 0.13 |       | 0.315  | 0.5959 |       | 1.000 | 0.022 | 0.984 | 0.118 |
|     | 50%   | 0.49 | 0.14 |       | 0.3523 | 0.6371 | 1.000 |       | 0.012 | 0.929 | 0.154 |
|     | 25%   | 0.12 | 0.09 |       | 0.0256 | 0.2232 | 0.022 | 0.012 |       | 0.881 | 0.017 |
|     | 12.5% | 0.31 | 0.27 |       | 0.0264 | 0.5996 | 0.984 | 0.929 | 0.881 |       | 0.063 |
